# Supplementary material for: H.264/SVC parameter optimization based on quantization parameter, MGS fragmentation, and user bandwidth distribution
Source: Springer Nature journal article supplement (doi:10.1186/1687-6180-2013-10), 2013-01-31

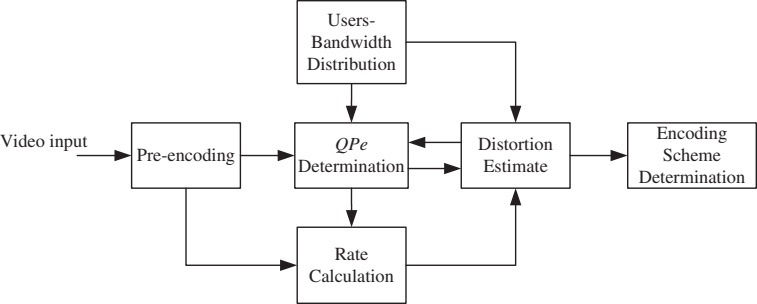

Supplement: 13634_2012_419_MOESM1_ESM.pdf [file 13634_2012_419_MOESM1_ESM.pdf]
