# Supplementary material for: H.264/SVC parameter optimization based on quantization parameter, MGS fragmentation, and user bandwidth distribution
Source: Springer Nature journal article supplement (doi:10.1186/1687-6180-2013-10), 2013-01-31
Supplement: 13634_2012_419_MOESM6_ESM.pdf [file 13634_2012_419_MOESM6_ESM.pdf]

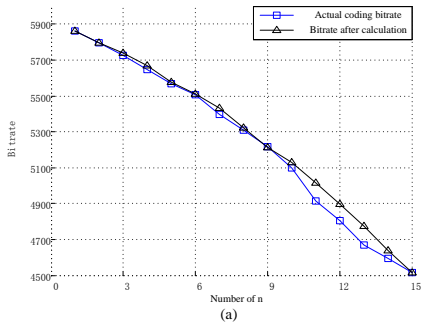

(a)

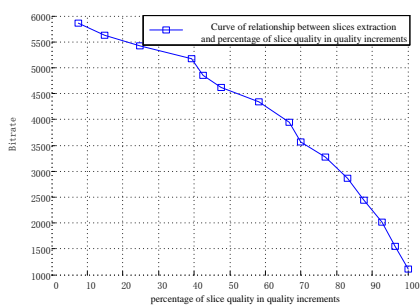

(b)

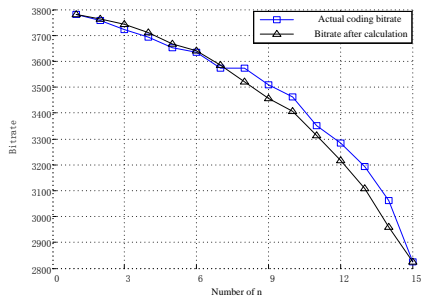

(c)

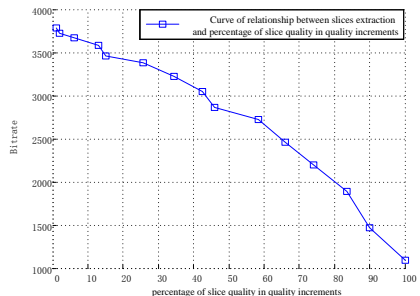

(d)
